# Supplementary material for: Overview of 71 European community-based initiatives against childhood obesity starting between 2005 and 2011: general characteristics and reported effects
Source: PubMed Central journal article supplement (PMC4125700; doi:10.1186/1471-2458-14-758), 2014-07-28
Supplement: 12889_2013_6895_MOESM1_ESM.pdf [file 12889_2013_6895_MOESM1_ESM.pdf]

## List of potentially suitable projects

### Method of identification

1= Suggested by key informants

2= Suggested by other professionals

3= Inventory of previous overviews and existing databases

4= WHO inventory 2008

5= Cochrane review of prevention projects (reference: 8)

| Country        | Potentially suitable projects                                 | Method of identification | Response | Eligible |
|----------------|---------------------------------------------------------------|--------------------------|----------|----------|
| <b>Austria</b> | 1 X-team                                                      | 1                        |          |          |
|                | 2 KIG Kinder im Gleichgewicht                                 | 1                        |          |          |
|                | 3 teen power 10/14                                            | 1                        |          |          |
|                | 4 Durch Dick und Dünn                                         | 1                        |          |          |
|                | 5 Rundum gesund                                               | 1                        |          |          |
|                | 6 Down and up                                                 | 1                        |          |          |
|                | 7 In.Form                                                     | 1                        |          |          |
| <b>Belgium</b> | 1 Fitte School                                                | 3,4                      |          |          |
|                | 2 VIASANO (EPODE methodology)                                 | 3                        | X        |          |
|                | 3 Middle School Intervention                                  | 3,5                      |          | No (8)   |
|                | 4 Tutti Frutti-project (fruit distribution in schools)        | 4                        |          |          |
|                | 5 My active food triangle                                     | 4                        |          |          |
|                | 6 Introducing healthy nutrition in special youth care centers | 4                        | X        |          |
|                | 7 Healthy behaviour at school Promotion plan                  | 4                        |          |          |
|                | 8 Gezondwerken (www.gezondwerken.be)                          | 1                        |          |          |
|                | 9 www.hartelijkebuurt.be                                      | 1                        |          |          |
|                | 10 Zahnhygiene und gesunde Ernährung in Schulen               | 1                        | X        |          |
|                | 11 Idefics                                                    | 2                        |          |          |
| <b>Bulgary</b> | 1 Health 4 schools                                            | 3                        |          |          |
|                | 2 Healthy eating in the kindergartens                         | 4                        |          |          |
|                | 3 Food and Nutrition Action Plan                              | 1                        |          |          |
| <b>Cyprus</b>  | 1 Cyprus Healthy Children Program                             | 1                        |          |          |

| Country               | Potentially suitable projects                      | Method of identification | Response | Eligible            |
|-----------------------|----------------------------------------------------|--------------------------|----------|---------------------|
| <b>Czech Republic</b> | 1 "Little Pyramid man"                             | 1                        | X        | No                  |
|                       | 2 Healthy Teeth                                    | 1                        |          |                     |
| <b>Denmark</b>        | 1 Diet in a nutshell (national initiative)         | 1                        | X        |                     |
|                       | 2 Shape Up lab                                     | 3                        |          |                     |
|                       | 3 The Municipalities Plan against Obesity          | 3,4                      | n.a.     | Not able to contact |
|                       | 4 Danish: Aktiv rundt i Danmark                    | 3                        |          |                     |
|                       | 5 "Boost - Frugt og grønt"                         | 4                        |          |                     |
|                       | 6 Spaces to move children. Local & Facilities Fund | 4                        |          |                     |
|                       | 7 Copenhagen School Child Intervention Study       | 4                        | X        |                     |
|                       | 8 6 a day ("6 om dagen")                           | 4                        |          |                     |
|                       | 9 Whole Grain Campaign                             | 4                        |          |                     |
|                       | 10 Get moving                                      | 4                        |          |                     |
| <b>Estonia</b>        | 1 Shape Up lab                                     | 3                        | n.a.     | Not able to contact |
|                       | 2 Camps for obese children                         | 1                        |          |                     |
| <b>Finland</b>        | 1 Attention to Weight! - Weight Control Program    | 1                        |          |                     |
|                       | 2 Children's Welfare Project (HYVIS)               | 1                        |          |                     |
|                       | 3 MUUVIT                                           | 2                        |          |                     |
| <b>France</b>         | 1 Together let's prevent childhood obesity"        | 3                        |          |                     |
|                       | 2 Shape Up lab                                     | 3                        |          |                     |
|                       | 3 Program in the Aquitaine region                  | 3                        | X        | No                  |
|                       | 4 Prevention overweight in preschool children      | 3                        |          |                     |
|                       | 5 ICAPS                                            | 3,5                      | X (8)    |                     |
|                       | 6 "Health Behaviour in School-Aged Children"       | 4                        | n.a.     | Not able to contact |
|                       | 7 Plan obésité                                     | 1                        | X        |                     |
|                       | 8 Programme national nutrition santé               | 1                        |          |                     |
|                       | 9 EPODE                                            | 2                        | X        |                     |
|                       | Jouret 2009                                        | 5                        | n.a. (8) |                     |
| Lazaar 2007           | 5                                                  | n.a. (8)                 |          |                     |
| Paineau, 2008         | 5                                                  | n.a. (8)                 |          |                     |
| <b>Germany</b>        | 1 Besser essen. Mehr bewegen.                      | 1                        | X        |                     |
|                       | 2 peb Projekt Junge Eltern - Ludwigsburg           | 1                        |          |                     |
|                       | 3 FördeKids                                        | 1                        |          |                     |

| Country        | Potentially suitable projects                     | Method of identification | Response | Eligible            |
|----------------|---------------------------------------------------|--------------------------|----------|---------------------|
|                | 4 Lebenslust-Leibeslust                           | 1                        | X        |                     |
|                | 5 Aktionsplan Holsteinische Schweiz               | 1                        |          |                     |
|                | 6 Projekt T.A.F.F.                                | 1,5                      | X (8)    |                     |
|                | 7 CrescNet                                        | 1                        | X        | No                  |
|                | 8 Kita Vital                                      | 1                        | X        |                     |
|                | Müller, 2001                                      | 5                        | n.a.     | No (8)              |
| <b>Greece</b>  | 1 The Vyronas study                               | 1                        |          |                     |
|                | 2 The CHILDREN study                              | 1                        | X        |                     |
|                | 3 Paideiatrophi                                   | 2                        | X        |                     |
| <b>Hungary</b> | 1 HAPPY                                           | 1                        | X        |                     |
|                | 2 Start with breakfast!                           | 1                        |          |                     |
|                | 3 Go Healthy! Programme                           | 1                        | X        |                     |
|                | 4 Healthy kindergarten in Hungary                 | 1                        |          |                     |
|                | 5 Eco-School Network                              | 1                        | X        |                     |
| <b>Iceland</b> | 1 Everything affects us, especially ourselves!    | 3                        | X        |                     |
|                | 2 6H.is                                           | 1                        | X        |                     |
|                | 3 Physical activity of Icelandic children         | 1                        |          |                     |
| <b>Ireland</b> | 1 Little steps to healthy eating/ living          | 4                        |          |                     |
|                | 2 National programmes "Irish Sports Council"      | 4                        |          |                     |
|                | 3 BeActive After-School activity programme        | 2                        | X        |                     |
|                | 4 School Meals Project, Limerick Food Partnership | 2                        |          |                     |
|                | 5 The Gardening Club, Surestart Shantallow        | 2                        |          |                     |
|                | 6 Healthy School Food Policy                      | 2                        |          |                     |
|                | 7 Fresh Fruit in Schools Project                  | 2                        | X        |                     |
|                | 8 Pack a Punch                                    | 2                        |          |                     |
|                | 9 Breakfast Club                                  | 2                        |          |                     |
|                | 10 CAWT                                           | 2                        |          |                     |
|                | 11 Cook It                                        | 2                        | X        |                     |
|                | 12 Action for life                                | 2                        | X        |                     |
|                | Harrison, 2006 "switch off, get active"           | 5                        | n.a. (8) |                     |
| <b>Italy</b>   | 1 Crescere Felix                                  | 1                        | n.a.     | Not able to contact |
|                | 2 Gaining health                                  | 1                        | X        | No                  |
|                | 3 Health aging                                    | 1                        |          |                     |

| Country            | Potentially suitable projects                           | Method of identification | Response | Eligible |
|--------------------|---------------------------------------------------------|--------------------------|----------|----------|
|                    | Amaro 2006 –Naples (school intervention)                | 5                        | n.a. (8) |          |
| <b>Latvia</b>      | <b>1</b> Project European Healthy Stadia Network        | 1                        | X        | No       |
| <b>Lithuania</b>   | <b>1</b> Course of action for School-children Nutrition | 1                        | X        | No       |
| <b>Luxembourg</b>  | <b>1</b> Action plan GIMB                               | 1                        |          |          |
| <b>Malta</b>       | <b>1</b> Girls on the Move                              | 4                        |          |          |
|                    | <b>2</b> Skolasport                                     | 4                        |          |          |
|                    | <b>3</b> Summer on the Move                             | 4                        |          |          |
|                    | <b>4</b> Active Youngsters                              | 4                        |          |          |
|                    | <b>5</b> Afterschool sports                             | 4                        |          |          |
|                    | <b>6</b> Sportsbuzz                                     | 4                        |          |          |
|                    | <b>7</b> Sportsfun                                      | 4                        |          |          |
|                    | <b>8</b> Arti-Sport                                     | 4                        |          |          |
|                    | <b>9</b> Sports for all Initiative                      | 4                        |          |          |
| <b>Netherlands</b> | <b>1</b> Communities in beweging                        | 1                        |          |          |
|                    | <b>2</b> JUMP-in: GGD Amsterdam.                        | 1                        |          |          |
|                    | <b>3</b> Lekker fit Rotterdam:                          | 1,5                      | (8)      |          |
|                    | <b>4</b> B-fit                                          | 1                        | X        |          |
|                    | <b>5</b> GO-Utrecht                                     | 1                        | X        |          |
|                    | <b>6</b> Familie Lekkerbek                              | 1                        | X        |          |
|                    | <b>7</b> Gezond Nijmegen                                | 1                        |          |          |
|                    | <b>8</b> Dik en doun in Grunn                           | 1                        |          |          |
|                    | <b>9</b> Voorkomen overgewicht bij kinderen             | 1                        |          |          |
|                    | <b>10</b> Valthermond Gezond                            | 1                        |          |          |
|                    | <b>11</b> Slagkracht Winterswijk                        | 1                        | X        |          |
|                    | <b>12</b> B.Slim                                        | 1                        | X        | No       |
|                    | <b>13</b> Gezonde Slagkracht van een Prachtstad         | 1                        |          |          |
|                    | <b>14</b> Gezonde Slagkracht Woerden                    | 1                        | X        |          |
|                    | <b>15</b> Lekker in je vel                              | 1                        | X        |          |
|                    | <b>16</b> De Gezondheidsrace                            | 1                        | X        |          |
|                    | <b>17</b> Gezond inrichten Gageldonk-West               | 1                        |          |          |
|                    | <b>18</b> Raalte gezond!                                | 1                        | X        |          |
|                    | <b>19</b> Wijkgezonder in Zeist                         | 1                        | X        |          |
|                    | <b>20</b> Sociale activeringscampagne in de RNV         | 1                        | X        |          |
|                    | <b>21</b> Gezond in de buurt                            | 1                        |          |          |

| Country         | Potentially suitable projects                                                 | Method of identification | Response | Eligible            |
|-----------------|-------------------------------------------------------------------------------|--------------------------|----------|---------------------|
|                 | 22 Samen gezond                                                               | 1                        | X        |                     |
|                 | 23 Rivierenland in Balans                                                     | 1                        |          |                     |
|                 | 24 sCoolsport                                                                 | 1                        | X        |                     |
|                 | 25 Fit en food                                                                | 1                        |          |                     |
|                 | 26 On the move - Haarlemmermeer                                               | 1                        | X        |                     |
|                 | 27 JOGG                                                                       | 1                        |          |                     |
|                 | Hameling-Baksteen, 2008 - Rhenen-Elst                                         | 5                        | n.a. (8) |                     |
|                 | Singh, 2009 - Do-IT                                                           | 5                        | n.a. (8) |                     |
|                 | Veldhuis 2009 – be active, eat right (youth health care)                      | 5                        | n.a. (8) |                     |
| <b>Norway</b>   | 1 Physical activity and healthy meals at school programme                     | 4                        |          |                     |
| <b>Poland</b>   | 1 National Programme for Prevention Overweight 2007-2011                      | 1                        | X        |                     |
|                 | 2 Keep Fit                                                                    | 1                        | X        |                     |
| <b>Portugal</b> | 1 Shape Up lab                                                                | 3                        |          |                     |
|                 | 2 PASSE                                                                       | 4                        |          |                     |
| <b>Romania</b>  | 1 Increase access primary medical prevention services                         | 1                        | X        |                     |
|                 | 2 I also live a healthy life!                                                 | 1                        | X        |                     |
| <b>Slovakia</b> | 1 Feedback method – with evaluation of body posture                           | 4                        |          |                     |
|                 | 2 Program health at schools in Trebišov district                              | 4                        |          |                     |
|                 | 3 National obesity prevention program                                         | 4                        |          |                     |
|                 | 4 School fruit schematic program "Skolske ovocie"                             | 4                        |          |                     |
| <b>Slovenia</b> | 1 Veter v laseh (Wind in your hair)                                           | 4                        |          |                     |
|                 | 2 Razvoj pristopov za spodbujanje zdrave prehrane in gibanja v srednjih šolah | 4                        |          |                     |
|                 | 3 FIT Slovenia International                                                  | 4                        |          |                     |
|                 | 4 Zdrava prehrana, zdrava mladina                                             | 4                        | n.a.     | Not able to contact |
|                 | 5 Šole, ki promovirajo zdravo prehrano (NFSI)                                 | 4                        |          |                     |
|                 | 6 Pro greens                                                                  | 4                        |          |                     |
|                 | 7 Vzgoja za zdravje (Education for health)                                    | 4                        |          |                     |
|                 | 8 Projekt Jabolko (Apple project)                                             | 4                        |          |                     |
|                 | 9 Zlati sonček (Golden sun)                                                   | 4                        |          |                     |
| <b>Spain</b>    | 1 Program Perseo / Programa Perseo                                            | 1                        |          |                     |
|                 | 2 Educative Program "5 per day"                                               | 1                        |          |                     |

| Country | Potentially suitable projects                            | Method of identification | Response | Eligible |
|---------|----------------------------------------------------------|--------------------------|----------|----------|
|         | 3 Program Thao - (Programa Thao- Salud infantil)         | 1                        | X        |          |
|         | 4 Delta Project                                          | 1                        | X        |          |
|         | 5 Children moving (Niños en movimiento)                  | 1                        |          |          |
|         | 6 Communitary project in Berriozar                       | 1                        |          |          |
|         | 7 DISFRUITA-LA                                           | 1                        |          |          |
|         | 8 Prevention of obesity in school-age population         | 1                        | X        |          |
|         | 9 PAIDO                                                  | 1                        | X        |          |
|         | 10 Program for schools' dining halls in Madrid Community | 1                        | X        |          |
|         | 11 Plan Integral de Villanueva de la Cañada              | 1                        |          |          |
|         | 12 Participative project in Extremadura                  | 1                        | X        |          |
|         | 13 NEREU Program (Programa NEREU)                        | 1                        |          |          |
|         | 14 MOVI Program                                          | 1,5                      | X (8)    |          |
|         | 15 Prevention project obesity                            | 1                        |          |          |
|         | 16 PIMSE                                                 | 1                        |          |          |
|         | 17 Move with us: Exercise looks after you                | 1                        | X        |          |
|         | 18 Program in Molina de Segura                           | 1                        | X        |          |
|         | 19 CAPSA                                                 | 1                        |          |          |
|         | 20 PASEA                                                 | 1                        |          |          |
|         | 21 Integral plan in Murcia                               | 1                        | X        |          |
|         | 22 Córdoba for health                                    | 1                        |          |          |
|         | 23 Attention in community health care centers            | 1                        | X        |          |
|         | 24 Plan for physical Activity, Sport and Health (PAFES)  | 1                        |          |          |
|         | 25 Strategy PAAS (Estrategia PAAS)                       | 1                        | X        | No       |
|         | 26 Project in Rioja                                      | 1                        |          |          |
|         | 27 Estrategia NAOS                                       | 1                        | X        | No       |
|         | 28 Integral Plan in Andalucia                            | 1                        |          |          |
|         | 29 POIBA project Barcelona                               | 1                        | X        |          |
| Sweden  | 1 Life in motion                                         | 4                        | X        | No       |
|         | 2 Skolmatsakademin (School meal Academy)                 | 4                        |          |          |
|         | 3 Runda barn (Överweight Children)                       | 4                        |          |          |
|         | 4 Enjoying Life - motion och mat för en friskare framtid | 4                        |          |          |
|         | 5 SECOPP                                                 | 4                        |          |          |
|         | 6 The Bunkeflo project                                   | 4                        |          |          |
|         | 7 Familjeviktsskolan [Family Weight School]              | 4                        | X        | No       |

| Country               | Potentially suitable projects                         | Method of identification | Response | Eligible |
|-----------------------|-------------------------------------------------------|--------------------------|----------|----------|
|                       | 8 Friska barn – förskolan                             | 4                        | X        |          |
|                       | 9 Föräldrastöd för goda mat                           | 4                        | X        |          |
|                       | 10 Implementing action plan 2004                      | 4                        |          |          |
|                       | 11 PRIMROSE                                           | 4                        |          |          |
|                       | 12 SALUT                                              | 4                        | X        |          |
|                       | 13 Viktiga barn och ungdomar                          | 4                        |          |          |
|                       | 14 STOPP                                              | 3                        |          |          |
|                       | 15 IDEFICS                                            | 3                        |          |          |
|                       | 16 Pro Greens                                         | 3                        |          |          |
|                       | 17 Gå eller cykla till skolan!                        | 3                        |          |          |
|                       | 18 Health Equilibrium Initiative                      | 2                        | X        |          |
|                       | 19 CBI (not specified)                                | 2                        |          |          |
|                       | 20 Regional program Vastra Gotaland                   | 2                        |          |          |
|                       | 21 Childhood obesity program in Jönköping County      | 2                        | X        |          |
|                       | 22 SCIP-school                                        | 2                        | X        | No       |
|                       | Marcus, 2009                                          | 5                        | n.a.     | No (8)   |
| <b>Switzerland</b>    | 1 Ballabeina study                                    | 3,5                      | (8)      |          |
|                       | 2 Cantonal Intervention Programms                     | 4                        |          |          |
|                       | 3 Pedibus                                             | 4                        |          |          |
|                       | 4 Aktion Znüni-Box "Gesundes Znüni"                   | 4                        |          |          |
|                       | 5 prevention project children 0-3 years               | 4                        | X        |          |
|                       | 6 SchoolCatering for Children and Adolescent          | 4                        |          |          |
|                       | 7 Kinder-SportstudieKISS                              | 4                        |          |          |
|                       | 8 Miges Balù                                          | 4                        | X        |          |
| <b>United Kingdom</b> | 1 CHOPPS                                              | 3,4,5                    |          | No (8)   |
|                       | 2 Snack right                                         | 3                        |          |          |
|                       | 3 Physical activity to prevent obesity                | 3,4                      |          |          |
|                       | 4 Walk to School campaign                             | 4                        |          |          |
|                       | 5 Bike it & Safe Routes to School                     | 4                        |          |          |
|                       | 6 Dragon sport                                        | 4                        |          |          |
|                       | 7 RCTadapting US school obesity prevention to England | 3                        |          |          |
|                       | 8 APPLES                                              | 3,5                      | X        | No (8)   |

| Country | Potentially suitable projects                        | Method of identification | Response | Eligible            |
|---------|------------------------------------------------------|--------------------------|----------|---------------------|
|         | 9 MEND Program (Mind, Exercise, Nutrition... Do It!) | 3                        | X        |                     |
|         | 10 The Children's Orchard                            | 3                        | n.a.     | Not able to contact |
|         | 11 Fit 4 Life – Rushmore Healthy Living              | 3                        | X        |                     |
|         | 12 Shape Up Lab                                      | 3                        |          |                     |
|         | 13 Change4Life                                       | 4                        |          |                     |
|         | 14 The East Midlands Declaration – Change4Life”      | 3                        |          |                     |
|         | 15 Appetite for life                                 | 4                        | X        | No                  |
|         | 16 Convenience Stores                                | 3,4                      |          |                     |
|         | 17 Get Active Northumberland                         | 1                        |          |                     |
|         | 18 On the Go                                         | 1                        | X        |                     |
|         | 19 Healthy4Life                                      | 1                        |          |                     |
|         | 20 Healthy weight communities                        | 1                        |          |                     |
|         | 21 DASH (Do Activity Stay Healthy)                   | 2                        |          |                     |
|         | 22 What's in Yours?' Healthy lunch boxes             | 2                        |          |                     |
|         | 23 Healthy Schools Plus - 'Food Factor'              | 2                        |          |                     |
|         | 24 Barnardo's Healthy Schools Play Projects          | 2                        | n.a.     | Not able to contact |
|         | 25 Why Weight Matters?                               | 2                        |          |                     |
|         | 26 Food for Life Partnership (FFLP)                  | 2                        | X        |                     |
|         | 27 HENRY                                             | 2                        |          |                     |
|         | 28 Bike It                                           | 2                        |          |                     |
|         | 29 Villa Vitality                                    | 2                        | X        |                     |
|         | 30 Active Play and Travel: Tackling Obesity          | 2                        |          |                     |
|         | 31 Antenatal Obesity Pilot                           | 2                        |          |                     |
|         | 32 Activ8 Community Gym                              | 2                        | X        | No                  |
|         | 33 B Active Scheme                                   | 2                        |          |                     |
|         | 34 Care Pathway for Children under 3                 | 2                        |          |                     |
|         | 35 Change for Life                                   | 2                        |          |                     |
|         | 36 Child Obesity Clinic: "Mandometer" technology     | 2                        | X        | No                  |
|         | 37 Early Years Family project                        | 2                        | n.a.     | Not able to contact |
|         |                                                      |                          |          | Not able to contact |
|         | 38 Fit for Life                                      | 2                        | n.a.     |                     |
|         | 39 Health & Well-being                               | 2                        |          |                     |
|         | 40 Healthy Kids Programme                            | 2                        |          |                     |
|         | 41 Healthy Weight, Healthy Lives                     | 2                        |          |                     |



| <b>Country</b> | <b>Potentially suitable projects</b>                 | <b>Method of identification</b> | <b>Response</b> | <b>Eligible</b>     |
|----------------|------------------------------------------------------|---------------------------------|-----------------|---------------------|
| 42             | LEAPActive                                           | 2                               |                 |                     |
| 43             | Looking after me - Change4Life                       | 2                               |                 |                     |
| 44             | Result!                                              | 2                               |                 |                     |
| 45             | Settling In Sessions                                 | 2                               | n.a.            | Not able to contact |
| 46             | Step Up                                              | 2                               |                 |                     |
| 47             | Tiger Teams                                          | 2                               |                 |                     |
| 48             | Walk to School                                       | 2                               |                 |                     |
| 49             | Schools4Life                                         | 2                               |                 |                     |
| 50             | Tutors models.                                       | 2                               |                 |                     |
| 51             | Fun, Food and Fitness Project                        | 2                               | X               |                     |
| 52             | NCMP team (national childhood measurement programme) | 2                               | X               |                     |
| 53             | Bath and North East Somerset                         | 2                               |                 |                     |
| 54             | Healthy Schools Plus South West                      | 2                               |                 |                     |
| 55             | Bath and North East Somerset                         | 2                               |                 |                     |
| 56             | Gloucestershire                                      | 2                               |                 |                     |
| 57             | Poole                                                | 2                               | n.a.            | Not able to contact |
| 58             | Somerset Healthy Schools Plus programme              | 2                               | n.a.            | Not able to contact |
| 59             | Five/60                                              | 2                               | X               |                     |
| 60             | Nottinghamshire county                               | 2                               |                 |                     |
| 61             | Fit and active families - Catch 22                   | 2                               |                 |                     |
| 62             | Family Lifestyle club (FLIC)                         | 2                               | X               |                     |
| 63             | GO4it                                                | 2                               |                 |                     |
| 64             | Fun 4 Life                                           | 2                               | X               |                     |
| 65             | Make it count                                        | 2                               |                 |                     |
| 66             | Weight Management Centre- lutton                     | 2                               |                 |                     |
| 67             | Integrated obesity Care Pathway                      | 2                               | X               |                     |
| 68             | NHS Dudley MEND                                      | 2                               | X               |                     |
| 69             | Leisure Services                                     | 2                               |                 |                     |
| 70             | School Travel Programme                              | 2                               |                 |                     |
| 71             | Community Health Champions                           | 2                               |                 |                     |
| 72             | A live and Kicking                                   | 2                               | X               |                     |
| 73             | FRESH                                                | 2                               | n.a.            | Not able to contact |
| 74             | Fit to Play                                          | 2                               | n.a.            | Not able to contact |
| 75             | Exercise Referral                                    | 2                               | n.a.            | Not able to contact |

| <b>Country</b> | <b>Potentially suitable projects</b> | <b>Method of identification</b> | <b>Response</b> | <b>Eligible</b>     |
|----------------|--------------------------------------|---------------------------------|-----------------|---------------------|
| <b>76</b>      | Skip4Life                            | 2                               | n.a.            | Not able to contact |
| <b>77</b>      | Sport & Play Development             | 2                               | n.a.            | Not able to contact |
| <b>78</b>      | Healthy Schools Programme            | 2                               | n.a.            | Not able to contact |
|                | Reilly, 2006                         | 5                               | n.a. (8)        |                     |
|                | Warren, 2003                         | 5                               | n.a. (8)        | No                  |
|                | Kipping, 2008                        | 5                               | n.a. (8)        |                     |
|                | Adab, 2008- Beaches                  | 5                               | n.a. (8)        |                     |
|                | Barlow, 2008 – EMPOWER program       | 5                               | n.a. (8)        |                     |

n.a. = not applicable
