# Supplementary material for: Overview of 71 European community-based initiatives against childhood obesity starting between 2005 and 2011: general characteristics and reported effects
Source: PubMed Central journal article supplement (PMC4125700; doi:10.1186/1471-2458-14-758), 2014-07-28
Supplement: 12889_2013_6895_MOESM2_ESM.pdf [file 12889_2013_6895_MOESM2_ESM.pdf]

## List of excluded projects and reasons

| Country/project                                            | Reason                                                                                     |
|------------------------------------------------------------|--------------------------------------------------------------------------------------------|
| Czech Republic / Little pyramid                            | No process evaluation                                                                      |
| France / Aquitaine region                                  | No involvement of target population reported <sup>1</sup> in planning or executing the CBI |
| Germany / Crescnet                                         | No involvement of target population reported in planning or executing the CBI              |
| Italy / Gaining health                                     | National action plan                                                                       |
| Latvia / European healthy                                  | No involvement of target population reported in planning or executing the CBI              |
| Lithuania / Course of action for School-children Nutrition | National action plan                                                                       |
| Netherlands / B-slim beweeg                                | No involvement of target population reported in planning or executing the CBI              |
| Spain / Strategy PAAS (Estrategia PAAS)                    | National action plan                                                                       |
| Spain / Estrategia NAOS                                    | National action plan                                                                       |
| Sweden / Scip school                                       | No involvement of target population reported in planning or executing the CBI              |
| Sweden / Family weight                                     | No involvement of target population reported in planning or executing the CBI              |
| Sweden / Life in motion                                    | No involvement of target population reported in planning or executing the CBI              |
| United Kingdom / Active 8 com                              | No process evaluation                                                                      |
| United Kingdom / appetite for live                         | No process evaluation                                                                      |
| United Kingdom / APPLES                                    | Period of implementation before 2005                                                       |
| United Kingdom / ncmp team                                 | No involvement of target population reported in planning or executing the CBI              |
| United Kingdom / Novel treatment                           | No intersectoral collaboration at the local level                                          |

<sup>1</sup>: in the electronic CBI questionnaire
